# Supplementary material for: Age-associated increase of the active zone protein Bruchpilot within the honeybee mushroom body
Source: PubMed Central journal article supplement (PMC5402947; doi:10.1371/journal.pone.0175894), 2017-04-24
Supplement: pone.0175894.s001.pdf [file pone.0175894.s001.pdf]

## S1 Table: data set Fig 4

The acquired value of the bands detected with a specific antibody (anti-BRB<sup>last200</sup> (BRP), anti-SYNORF1 (Syn), anti- $\alpha$ -Tubulin (Tub)) was normalized to the mean value of all bands detected with this antibody on the same blot (gel-normalized). The two main AmBRP and  $\alpha$ -Tubulin bands were measured as one band. Finally, the ratio between the normalized AmBRP and  $\alpha$ -Tubulin values or the normalized Synapsin and  $\alpha$ -Tubulin values was calculated for each sample (tubulin-normalized). One sample represented one bee brain.

| age | bee | gel | antibody | intensity | mean intensity of antibody on gel | gel-normalized | tubulin-normalized |
|-----|-----|-----|----------|-----------|-----------------------------------|----------------|--------------------|
| 1   | 1   | 1   | BRP      | 8512.70   | 24530.35                          | 0.35           | 0.76               |
| 1   | 1   | 1   | Syn      | 16603.00  | 61461.37                          | 0.27           | 0.60               |
| 1   | 1   | 1   | Tub      | 11701.67  | 25775.41                          | 0.45           |                    |
| 8   | 17  | 1   | BRP      | 13852.80  |                                   | 0.56           | 0.67               |
| 8   | 17  | 1   | Syn      | 43108.36  |                                   | 0.70           | 0.84               |
| 8   | 17  | 1   | Tub      | 21622.89  |                                   | 0.84           |                    |
| 15  | 28  | 1   | BRP      | 20716.47  |                                   | 0.84           | 1.46               |
| 15  | 28  | 1   | Syn      | 51183.71  |                                   | 0.83           | 1.44               |
| 15  | 28  | 1   | Tub      | 14941.60  |                                   | 0.58           |                    |
| 29  | 43  | 1   | BRP      | 40790.83  |                                   | 1.66           | 1.55               |
| 29  | 43  | 1   | Syn      | 84947.25  |                                   | 1.38           | 1.29               |
| 29  | 43  | 1   | Tub      | 27709.36  |                                   | 1.08           |                    |
| 43  | 58  | 1   | BRP      | 19127.22  |                                   | 0.78           | 0.74               |
| 43  | 58  | 1   | Syn      | 65293.35  |                                   | 1.06           | 1.01               |
| 43  | 58  | 1   | Tub      | 27211.75  |                                   | 1.06           |                    |
| 1   | 2   | 1   | BRP      | 24035.89  |                                   | 0.98           | 1.00               |
| 1   | 2   | 1   | Syn      | 54198.49  |                                   | 0.88           | 0.90               |
| 1   | 2   | 1   | Tub      | 25233.72  |                                   | 0.98           |                    |
| 8   | 18  | 1   | BRP      | 23670.11  |                                   | 0.96           | 1.02               |
| 8   | 18  | 1   | Syn      | 63317.25  |                                   | 1.03           | 1.09               |
| 8   | 18  | 1   | Tub      | 24430.71  |                                   | 0.95           |                    |
| 15  | 29  | 1   | BRP      | 45153.63  |                                   | 1.84           | 1.27               |
| 15  | 29  | 1   | Syn      | 100421.12 |                                   | 1.63           | 1.12               |
| 15  | 29  | 1   | Tub      | 37447.00  |                                   | 1.45           |                    |
| 29  | 44  | 1   | BRP      | 26815.08  |                                   | 1.09           | 1.01               |
| 29  | 44  | 1   | Syn      | 69540.49  |                                   | 1.13           | 1.05               |

|    |    |   |     |          |          |      |      |
|----|----|---|-----|----------|----------|------|------|
| 29 | 44 | 1 | Tub | 27854.14 |          | 1.08 |      |
| 43 | 59 | 1 | BRP | 23237.49 |          | 0.95 | 0.65 |
| 43 | 59 | 1 | Syn | 62251.44 |          | 1.01 | 0.69 |
| 43 | 59 | 1 | Tub | 37642.71 |          | 1.46 |      |
| 1  | 3  | 1 | BRP | 37686.80 |          | 1.54 | 1.16 |
| 1  | 3  | 1 | Syn | 89315.11 |          | 1.45 | 1.10 |
| 1  | 3  | 1 | Tub | 34006.67 |          | 1.32 |      |
| 8  | 19 | 1 | BRP | 10765.16 |          | 0.44 | 0.58 |
| 8  | 19 | 1 | Syn | 37356.86 |          | 0.61 | 0.80 |
| 8  | 19 | 1 | Tub | 19502.72 |          | 0.76 |      |
| 15 | 30 | 2 | BRP | 10390.69 | 25054.30 | 0.41 | 0.41 |
| 15 | 30 | 2 | Syn | 88555.54 | 76186.47 | 1.16 | 1.16 |
| 15 | 30 | 2 | Tub | 32596.41 | 32507.35 | 1.00 |      |
| 29 | 45 | 2 | BRP | 8583.53  |          | 0.34 | 0.49 |
| 29 | 45 | 2 | Syn | 59812.20 |          | 0.79 | 1.11 |
| 29 | 45 | 2 | Tub | 22905.23 |          | 0.70 |      |
| 43 | 60 | 2 | BRP | 21527.45 |          | 0.86 | 0.83 |
| 43 | 60 | 2 | Tub | 33613.53 |          | 1.03 |      |
| 1  | 4  | 2 | BRP | 22484.19 |          | 0.90 | 0.94 |
| 1  | 4  | 2 | Tub | 30996.33 |          | 0.95 |      |
| 8  | 20 | 2 | BRP | 9641.22  |          | 0.38 | 0.59 |
| 8  | 20 | 2 | Tub | 21041.65 |          | 0.65 |      |
| 15 | 31 | 2 | BRP | 37358.65 |          | 1.49 | 1.29 |
| 15 | 31 | 2 | Tub | 37695.82 |          | 1.16 |      |
| 29 | 46 | 2 | BRP | 42760.69 |          | 1.71 | 1.03 |
| 29 | 46 | 2 | Tub | 54064.76 |          | 1.66 |      |
| 43 | 61 | 2 | BRP | 59853.64 |          | 2.39 | 1.71 |
| 43 | 61 | 2 | Tub | 45350.42 |          | 1.40 |      |
| 1  | 5  | 2 | BRP | 25334.08 |          | 1.01 | 1.12 |
| 1  | 5  | 2 | Tub | 29376.14 |          | 0.90 |      |
| 8  | 21 | 2 | BRP | 14768.63 |          | 0.59 | 0.98 |
| 8  | 21 | 2 | Tub | 19484.79 |          | 0.60 |      |
| 15 | 32 | 2 | BRP | 35734.09 |          | 1.43 | 1.68 |
| 15 | 32 | 2 | Syn | 90002.26 |          | 1.18 | 1.39 |
| 15 | 32 | 2 | Tub | 27673.56 |          | 0.85 |      |
| 29 | 47 | 2 | BRP | 27174.58 |          | 1.08 | 0.94 |
| 29 | 47 | 2 | Syn | 88867.67 |          | 1.17 | 1.01 |

|    |    |   |     |           |          |      |      |
|----|----|---|-----|-----------|----------|------|------|
| 29 | 47 | 2 | Tub | 37357.91  |          | 1.15 |      |
| 43 | 62 | 2 | BRP | 10094.50  |          | 0.40 | 0.43 |
| 43 | 62 | 2 | Syn | 53694.67  |          | 0.70 | 0.75 |
| 43 | 62 | 2 | Tub | 30439.00  |          | 0.94 |      |
| 1  | 6  | 3 | BRP | 12503.79  | 34347.38 | 0.36 | 0.36 |
| 1  | 6  | 3 | Syn | 37769.09  | 63100.18 | 0.60 | 0.60 |
| 1  | 6  | 3 | Tub | 25173.56  | 25105.60 | 1.00 |      |
| 8  | 22 | 3 | BRP | 12730.87  |          | 0.37 | 0.63 |
| 8  | 22 | 3 | Syn | 36869.04  |          | 0.58 | 1.00 |
| 8  | 22 | 3 | Tub | 14681.65  |          | 0.58 |      |
| 15 | 33 | 3 | BRP | 31762.50  |          | 0.92 | 0.98 |
| 15 | 33 | 3 | Syn | 85077.00  |          | 1.35 | 1.43 |
| 15 | 33 | 3 | Tub | 23685.00  |          | 0.94 |      |
| 29 | 48 | 3 | BRP | 49015.31  |          | 1.43 | 0.97 |
| 29 | 48 | 3 | Syn | 100209.58 |          | 1.59 | 1.08 |
| 29 | 48 | 3 | Tub | 36973.60  |          | 1.47 |      |
| 43 | 63 | 3 | BRP | 50528.19  |          | 1.47 | 1.26 |
| 43 | 63 | 3 | Syn | 90273.20  |          | 1.43 | 1.23 |
| 43 | 63 | 3 | Tub | 29315.59  |          | 1.17 |      |
| 1  | 7  | 3 | BRP | 26741.98  |          | 0.78 | 0.76 |
| 1  | 7  | 3 | Syn | 47105.00  |          | 0.75 | 0.73 |
| 1  | 7  | 3 | Tub | 25787.23  |          | 1.03 |      |
| 8  | 23 | 3 | BRP | 37970.09  |          | 1.11 | 1.09 |
| 8  | 23 | 3 | Syn | 52874.57  |          | 0.84 | 0.83 |
| 8  | 23 | 3 | Tub | 25383.09  |          | 1.01 |      |
| 15 | 34 | 3 | BRP | 31901.38  |          | 0.93 | 0.93 |
| 15 | 34 | 3 | Syn | 49162.27  |          | 0.78 | 0.78 |
| 15 | 34 | 3 | Tub | 24947.95  |          | 0.99 |      |
| 29 | 49 | 3 | BRP | 22887.33  |          | 0.67 | 0.57 |
| 29 | 49 | 3 | Syn | 69950.36  |          | 1.11 | 0.96 |
| 29 | 49 | 3 | Tub | 29096.50  |          | 1.16 |      |
| 43 | 64 | 3 | BRP | 70580.35  |          | 2.05 | 1.85 |
| 43 | 64 | 3 | Syn | 98177.82  |          | 1.56 | 1.40 |
| 43 | 64 | 3 | Tub | 27957.00  |          | 1.11 |      |
| 1  | 8  | 3 | BRP | 23082.29  |          | 0.67 | 0.87 |
| 1  | 8  | 3 | Syn | 42365.61  |          | 0.67 | 0.87 |
| 1  | 8  | 3 | Tub | 19390.92  |          | 0.77 |      |

|    |    |   |     |           |          |      |      |
|----|----|---|-----|-----------|----------|------|------|
| 8  | 24 | 3 | BRP | 42464.50  |          | 1.24 | 1.64 |
| 8  | 24 | 3 | Syn | 47368.64  |          | 0.75 | 1.00 |
| 8  | 24 | 3 | Tub | 18875.12  |          | 0.75 |      |
| 15 | 35 | 4 | BRP | 27173.95  | 32460.28 | 0.79 | 0.78 |
| 15 | 35 | 4 | Syn | 85242.74  | 64126.98 | 1.23 | 1.21 |
| 15 | 35 | 4 | Tub | 32538.82  | 29958.07 | 1.02 |      |
| 29 | 50 | 4 | BRP | 19172.15  |          | 0.56 | 1.08 |
| 29 | 50 | 4 | Syn | 57231.17  |          | 0.83 | 1.59 |
| 29 | 50 | 4 | Tub | 16656.03  |          | 0.52 |      |
| 43 | 65 | 4 | BRP | 30834.84  |          | 0.90 | 0.69 |
| 43 | 65 | 4 | Syn | 95192.47  |          | 1.38 | 1.06 |
| 43 | 65 | 4 | Tub | 41572.40  |          | 1.30 |      |
| 1  | 9  | 4 | BRP | 18247.00  |          | 0.53 | 0.61 |
| 1  | 9  | 4 | Syn | 48659.75  |          | 0.70 | 0.81 |
| 1  | 9  | 4 | Tub | 27770.32  |          | 0.87 |      |
| 15 | 36 | 4 | BRP | 39763.26  |          | 1.16 | 1.31 |
| 15 | 36 | 4 | Syn | 84958.33  |          | 1.23 | 1.39 |
| 15 | 36 | 4 | Tub | 28379.51  |          | 0.89 |      |
| 29 | 51 | 4 | BRP | 43307.95  |          | 1.27 | 0.95 |
| 29 | 51 | 4 | Syn | 68402.30  |          | 0.99 | 0.75 |
| 29 | 51 | 4 | Tub | 42476.70  |          | 1.33 |      |
| 43 | 66 | 4 | BRP | 80973.46  |          | 2.37 | 1.29 |
| 43 | 66 | 4 | Syn | 129423.31 |          | 1.87 | 1.02 |
| 43 | 66 | 4 | Tub | 58564.08  |          | 1.83 |      |
| 1  | 10 | 4 | BRP | 10276.31  |          | 0.30 | 0.43 |
| 1  | 10 | 4 | Syn | 22561.69  |          | 0.33 | 0.47 |
| 1  | 10 | 4 | Tub | 22122.82  |          | 0.69 |      |
| 8  | 26 | 4 | BRP | 28303.59  |          | 0.83 | 0.90 |
| 8  | 26 | 4 | Syn | 49950.66  |          | 0.72 | 0.79 |
| 8  | 26 | 4 | Tub | 29373.62  |          | 0.92 |      |
| 15 | 37 | 4 | BRP | 61174.10  |          | 1.79 | 1.58 |
| 15 | 37 | 4 | Syn | 82882.52  |          | 1.20 | 1.06 |
| 15 | 37 | 4 | Tub | 36169.22  |          | 1.13 |      |
| 29 | 52 | 4 | BRP | 17098.00  |          | 0.50 | 0.99 |
| 29 | 52 | 4 | Syn | 35527.16  |          | 0.51 | 1.02 |
| 29 | 52 | 4 | Tub | 16128.29  |          | 0.50 |      |
| 1  | 11 | 5 | BRP | 7685.00   | 18688.75 | 0.41 | 0.57 |

|    |    |   |     |           |          |      |      |
|----|----|---|-----|-----------|----------|------|------|
| 1  | 11 | 5 | Syn | 23506.75  | 69342.05 | 0.34 | 0.47 |
| 1  | 11 | 5 | Tub | 18597.32  | 25830.81 | 0.72 |      |
| 8  | 38 | 5 | BRP | 5906.50   |          | 0.32 | 0.77 |
| 8  | 38 | 5 | Syn | 21828.09  |          | 0.31 | 0.77 |
| 8  | 38 | 5 | Tub | 10546.50  |          | 0.41 |      |
| 15 | 39 | 5 | BRP | 22096.81  |          | 1.18 | 1.68 |
| 15 | 39 | 5 | Syn | 77900.31  |          | 1.12 | 1.60 |
| 15 | 39 | 5 | Tub | 18160.29  |          | 0.70 |      |
| 29 | 53 | 5 | BRP | 34228.33  |          | 1.83 | 1.71 |
| 29 | 53 | 5 | Syn | 107470.13 |          | 1.55 | 1.45 |
| 29 | 53 | 5 | Tub | 27671.43  |          | 1.07 |      |
| 43 | 67 | 5 | BRP | 22604.27  |          | 1.21 | 1.11 |
| 43 | 67 | 5 | Syn | 95578.17  |          | 1.38 | 1.26 |
| 43 | 67 | 5 | Tub | 28238.44  |          | 1.09 |      |
| 1  | 12 | 5 | BRP | 6294.40   |          | 0.34 | 0.46 |
| 1  | 12 | 5 | Syn | 33300.13  |          | 0.48 | 0.66 |
| 1  | 12 | 5 | Tub | 18770.00  |          | 0.73 |      |
| 8  | 27 | 5 | BRP | 5958.54   |          | 0.32 | 0.51 |
| 8  | 27 | 5 | Syn | 29926.29  |          | 0.43 | 0.69 |
| 8  | 27 | 5 | Tub | 16225.79  |          | 0.63 |      |
| 15 | 40 | 5 | BRP | 24453.43  |          | 1.31 | 0.76 |
| 15 | 40 | 5 | Syn | 93290.32  |          | 1.35 | 0.79 |
| 15 | 40 | 5 | Tub | 44245.00  |          | 1.71 |      |
| 29 | 54 | 5 | BRP | 22774.37  |          | 1.22 | 0.75 |
| 29 | 54 | 5 | Syn | 90430.69  |          | 1.30 | 0.80 |
| 29 | 54 | 5 | Tub | 42165.63  |          | 1.63 |      |
| 43 | 68 | 5 | BRP | 37226.51  |          | 1.99 | 1.24 |
| 43 | 68 | 5 | Syn | 133570.63 |          | 1.93 | 1.20 |
| 43 | 68 | 5 | Tub | 41343.75  |          | 1.60 |      |
| 1  | 13 | 5 | BRP | 5550.46   |          | 0.30 | 0.78 |
| 1  | 13 | 5 | Syn | 14080.01  |          | 0.20 | 0.54 |
| 1  | 13 | 5 | Tub | 9778.12   |          | 0.38 |      |
| 15 | 41 | 5 | BRP | 29486.40  |          | 1.58 | 1.19 |
| 15 | 41 | 5 | Syn | 111223.04 |          | 1.60 | 1.21 |
| 15 | 41 | 5 | Tub | 34227.50  |          | 1.33 |      |
| 29 | 55 | 6 | BRP | 4520.73   | 16806.79 | 0.27 | 0.48 |
| 29 | 55 | 6 | Syn | 34327.40  | 69745.10 | 0.49 | 0.89 |

|    |    |   |     |           |          |      |      |
|----|----|---|-----|-----------|----------|------|------|
| 29 | 55 | 6 | Tub | 16092.54  | 29005.67 | 0.55 |      |
| 43 | 69 | 6 | BRP | 10418.41  |          | 0.62 | 0.78 |
| 43 | 69 | 6 | Syn | 65653.33  |          | 0.94 | 1.18 |
| 43 | 69 | 6 | Tub | 23182.58  |          | 0.80 |      |
| 1  | 14 | 6 | BRP | 7282.50   |          | 0.43 | 0.50 |
| 1  | 14 | 6 | Syn | 43155.60  |          | 0.62 | 0.71 |
| 1  | 14 | 6 | Tub | 25240.47  |          | 0.87 |      |
| 15 | 42 | 6 | BRP | 34547.48  |          | 2.06 | 1.71 |
| 15 | 42 | 6 | Tub | 34855.97  |          | 1.20 |      |
| 29 | 56 | 6 | BRP | 14391.11  |          | 0.86 | 1.52 |
| 29 | 56 | 6 | Tub | 16378.17  |          | 0.56 |      |
| 43 | 70 | 6 | BRP | 16568.00  |          | 0.99 | 0.77 |
| 43 | 70 | 6 | Syn | 67561.00  |          | 0.97 | 0.75 |
| 43 | 70 | 6 | Tub | 37301.50  |          | 1.29 |      |
| 1  | 15 | 6 | BRP | 7978.89   |          | 0.47 | 0.46 |
| 1  | 15 | 6 | Syn | 45359.12  |          | 0.65 | 0.63 |
| 1  | 15 | 6 | Tub | 29830.70  |          | 1.03 |      |
| 29 | 57 | 6 | BRP | 46603.16  |          | 2.77 | 1.72 |
| 29 | 57 | 6 | Syn | 155874.44 |          | 2.23 | 1.38 |
| 29 | 57 | 6 | Tub | 46857.50  |          | 1.62 |      |
| 43 | 71 | 6 | BRP | 11963.93  |          | 0.71 | 0.71 |
| 43 | 71 | 6 | Syn | 64379.08  |          | 0.92 | 0.93 |
| 43 | 71 | 6 | Tub | 28934.75  |          | 1.00 |      |
| 1  | 16 | 6 | BRP | 15015.19  |          | 0.89 | 0.79 |
| 1  | 16 | 6 | Syn | 57623.42  |          | 0.83 | 0.73 |
| 1  | 16 | 6 | Tub | 32815.42  |          | 1.13 |      |
| 43 | 72 | 6 | BRP | 26646.03  |          | 1.59 | 1.74 |
| 43 | 72 | 6 | Syn | 92019.92  |          | 1.32 | 1.45 |
| 43 | 72 | 6 | Tub | 26416.79  |          | 0.91 |      |
| 43 | 73 | 6 | BRP | 5746.00   |          | 0.34 | 0.33 |
| 43 | 73 | 6 | Syn | 71497.69  |          | 1.03 | 0.99 |
| 43 | 73 | 6 | Tub | 30161.63  |          | 1.04 |      |
